# Supplementary figures and images for: Using Seismic Attributes in seismotectonic research: an application to the Norcia's Mw = 6.5 earthquake (30th October 2016) in Central Italy
Source: Copernicus journal article supplement (doi:10.5194/se-2019-108), 2019-06-27

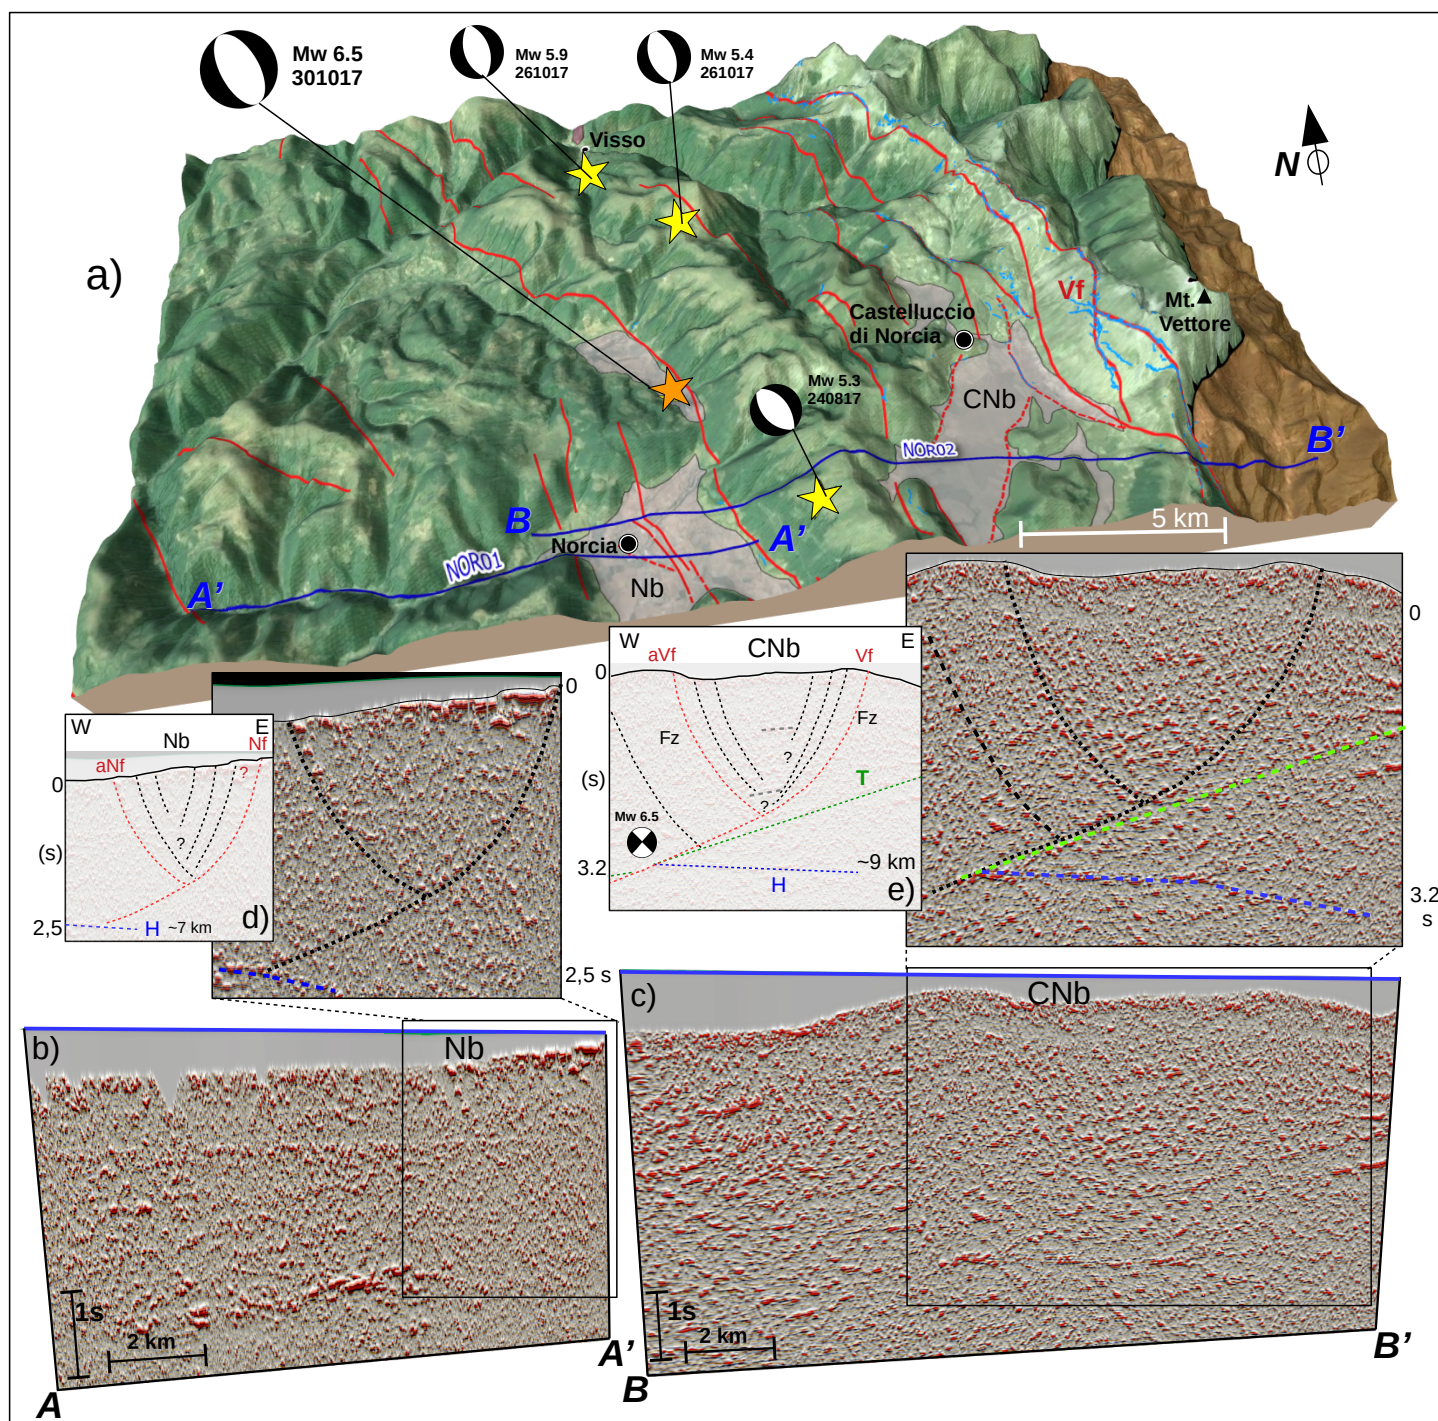

Supplement: Supplementary file 1 [file se-2019-108-supplement.zip]

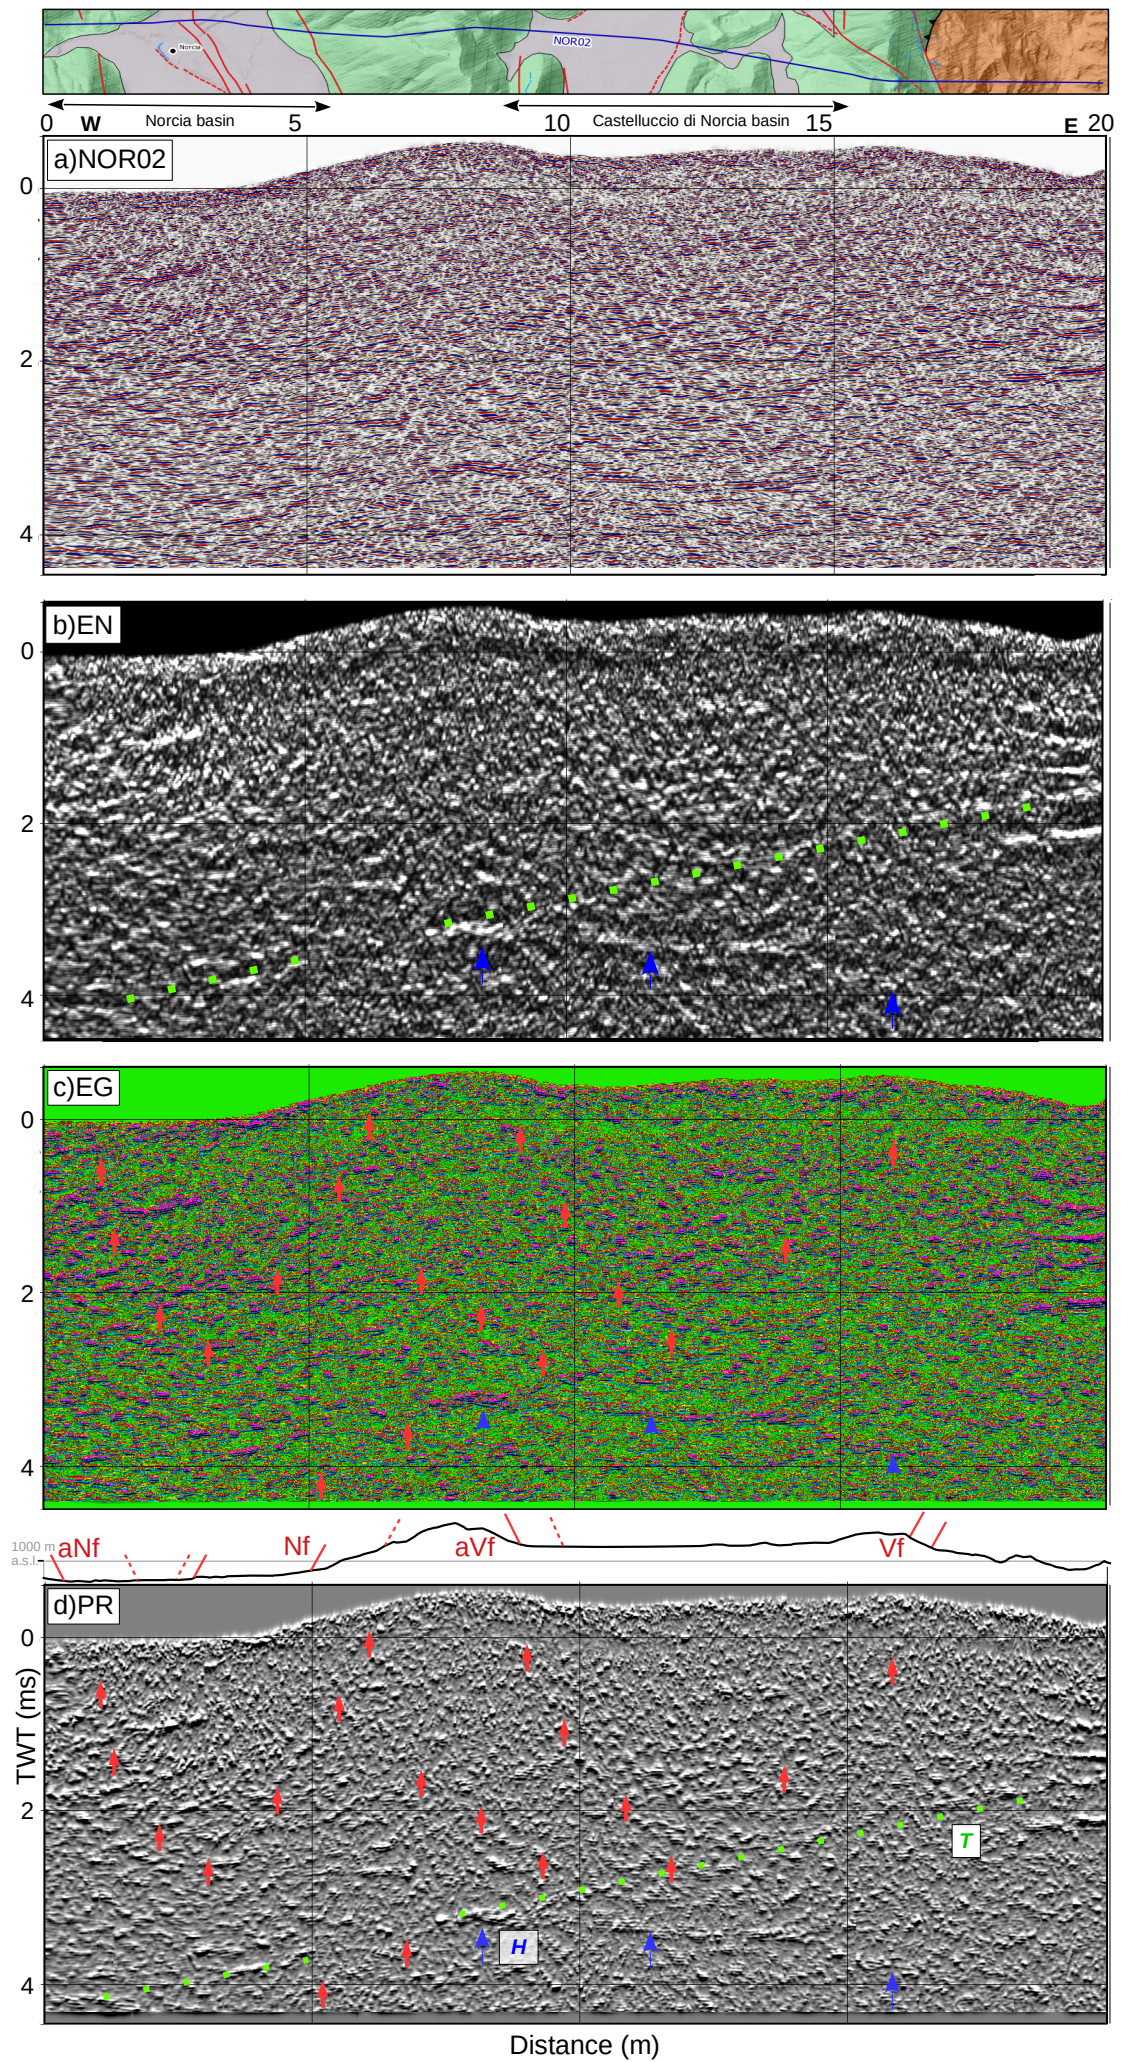

Supplement: Supplementary file 2 [file se-2019-108-supplement.zip]

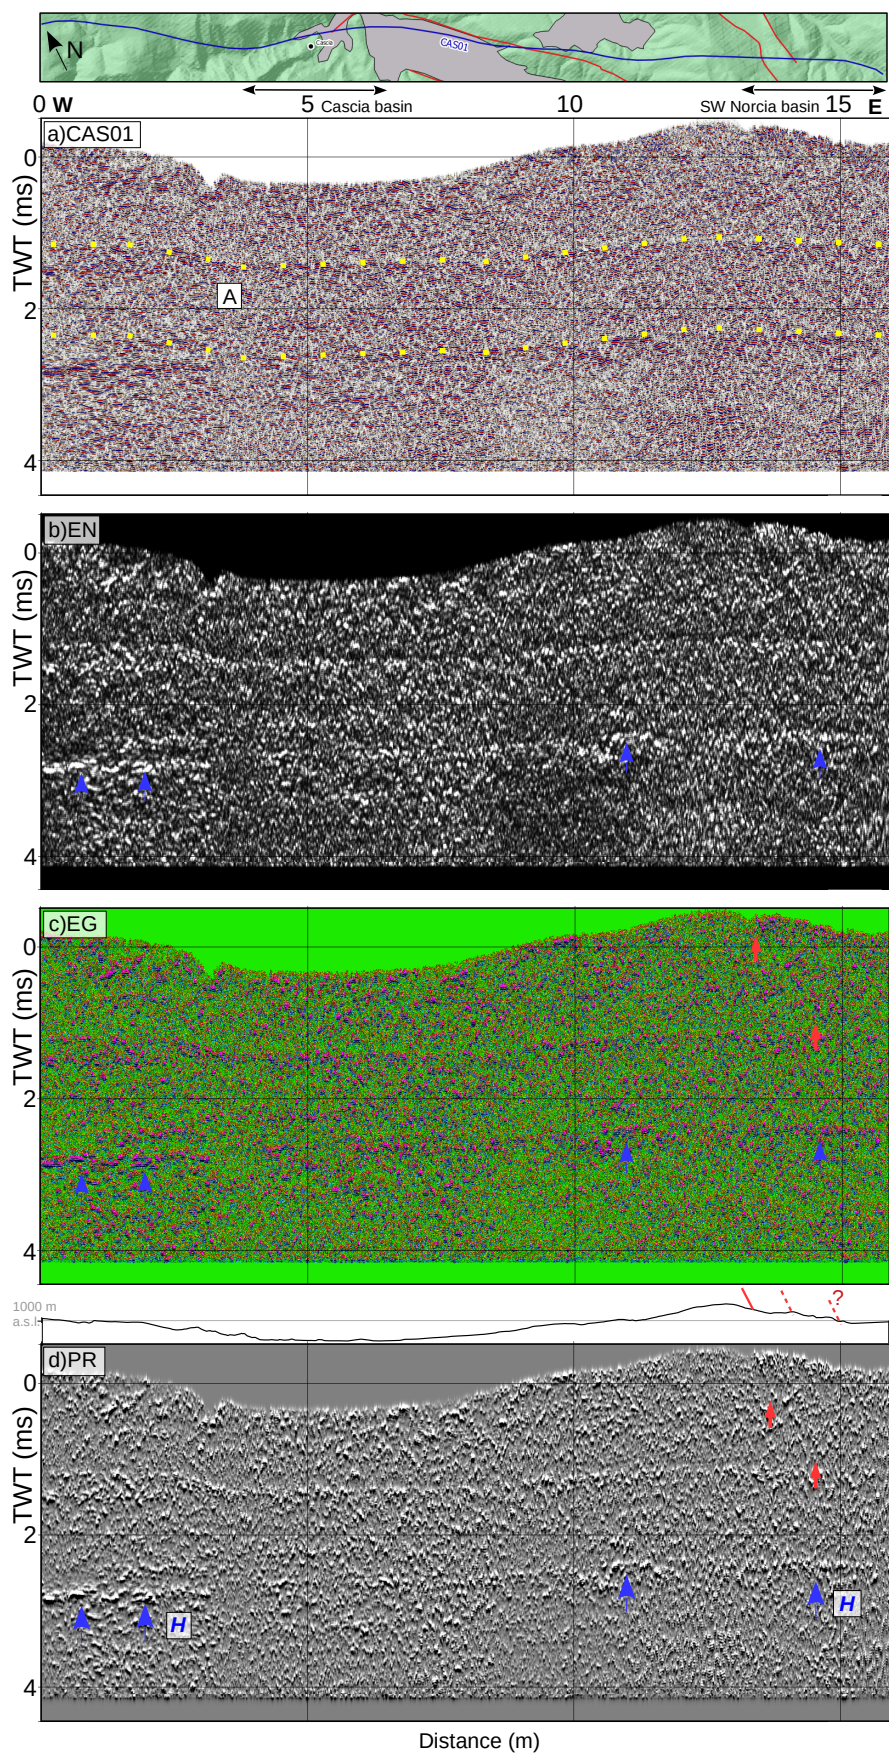

Supplement: Supplementary file 3 [file se-2019-108-supplement.zip]

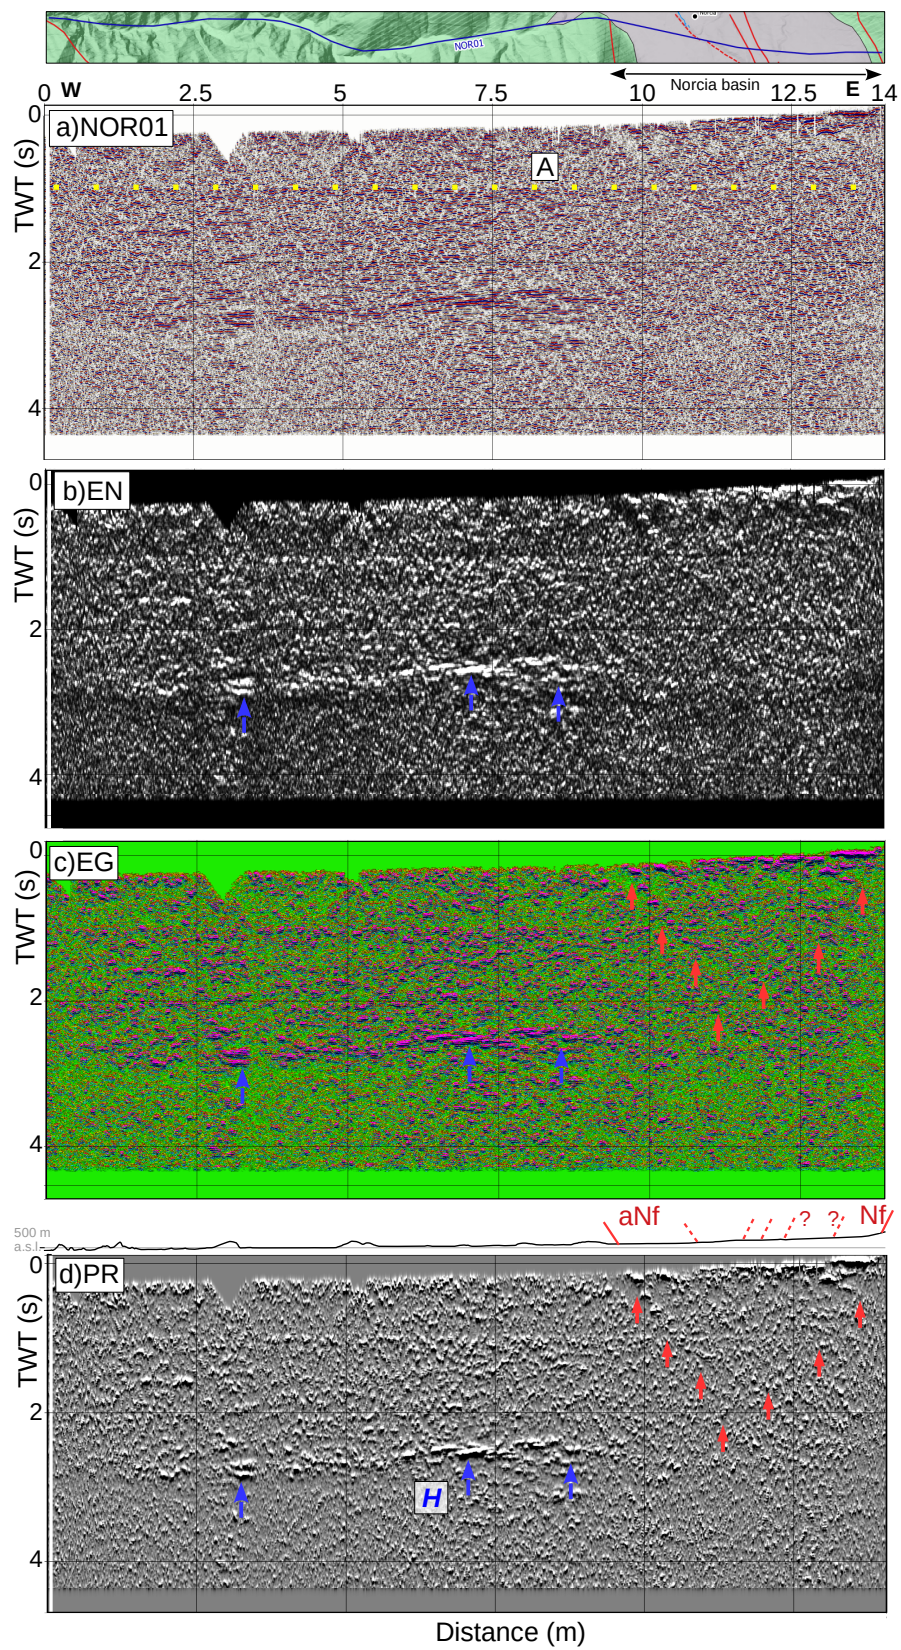

Supplement: Supplementary file 4 [file se-2019-108-supplement.zip]

# a) SEISMIC PROFILE – NOR01

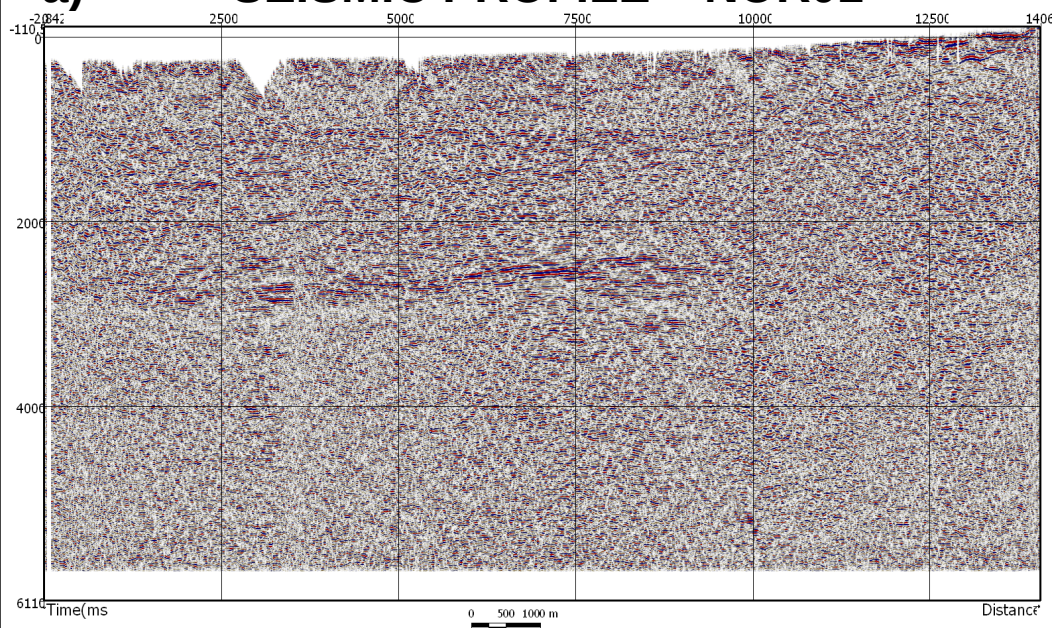

# b) SEISMIC PROFILE – NOR02

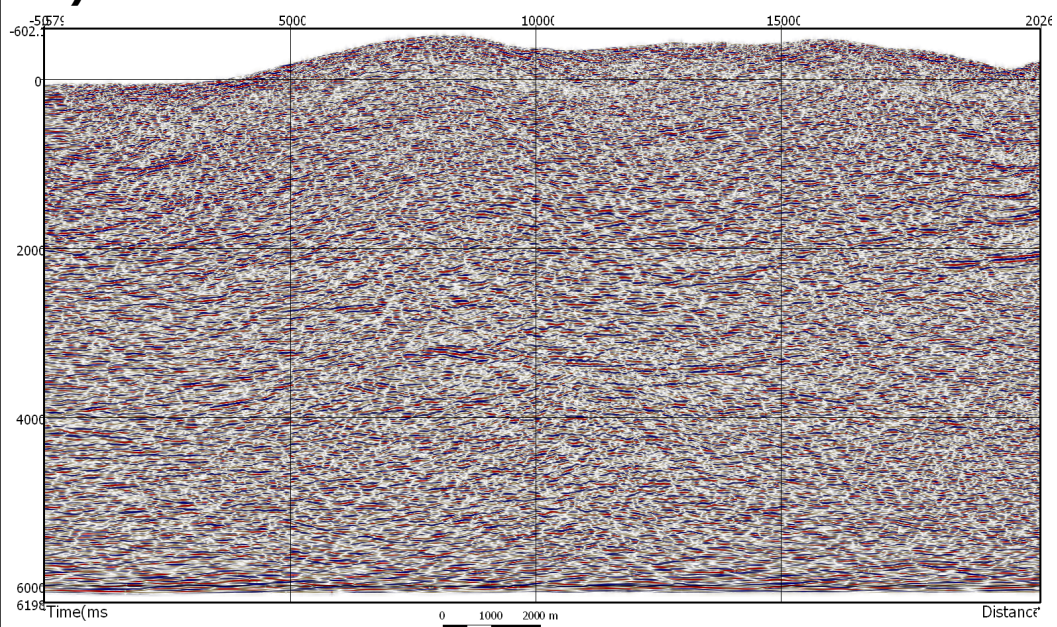

# c) SEISMIC PROFILE – NOR03

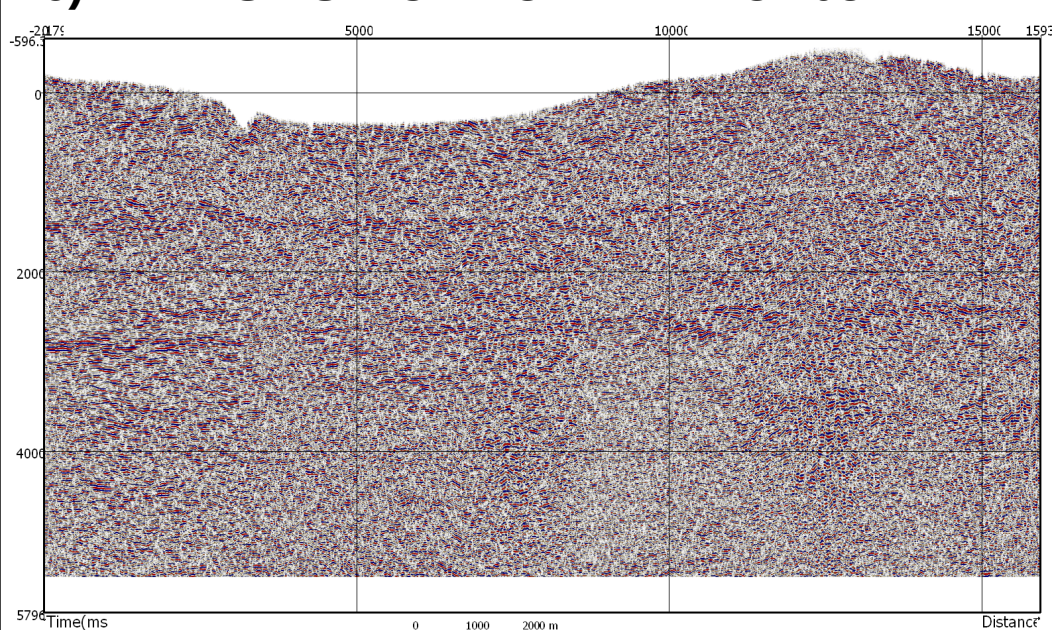

Supplement: Supplementary file 5 [file se-2019-108-supplement.zip]
